# Supplementary material for: Reflectance Spectroscopy for Non-Destructive Measurement and Genetic Analysis of Amounts and Types of Epicuticular Waxes on Onion Leaves
Source: MDPI journal article supplement (doi:10.3390/molecules25153454), 2020-07-29
Supplement: s1 [file s1]

# Reflectance Spectroscopy for Non-Destructive Measurement and Genetic Analysis of Amounts and Types of Epicuticular Waxes on Onion Leaves

Eduardo D. Munaiz <sup>1</sup>, Philip A. Townsend <sup>2</sup> and Michael J. Havey <sup>3\*</sup>

<sup>1</sup> Department of Horticulture, University of Wisconsin, 1575 Linden Drive, Madison, WI 53706 USA; dominguezmun@wisc.edu

<sup>2</sup> Department of Forestry and Wildlife Ecology, University of Wisconsin, 1575 Linden Drive, Madison, WI 53706 USA; ptownsend@wisc.edu

<sup>3</sup> USDA-ARS and Department of Horticulture, University of Wisconsin, 1575 Linden Drive, Madison, WI 53706 USA; michael.havey@usda.gov

\* Correspondence: michael.havey@usda.gov;

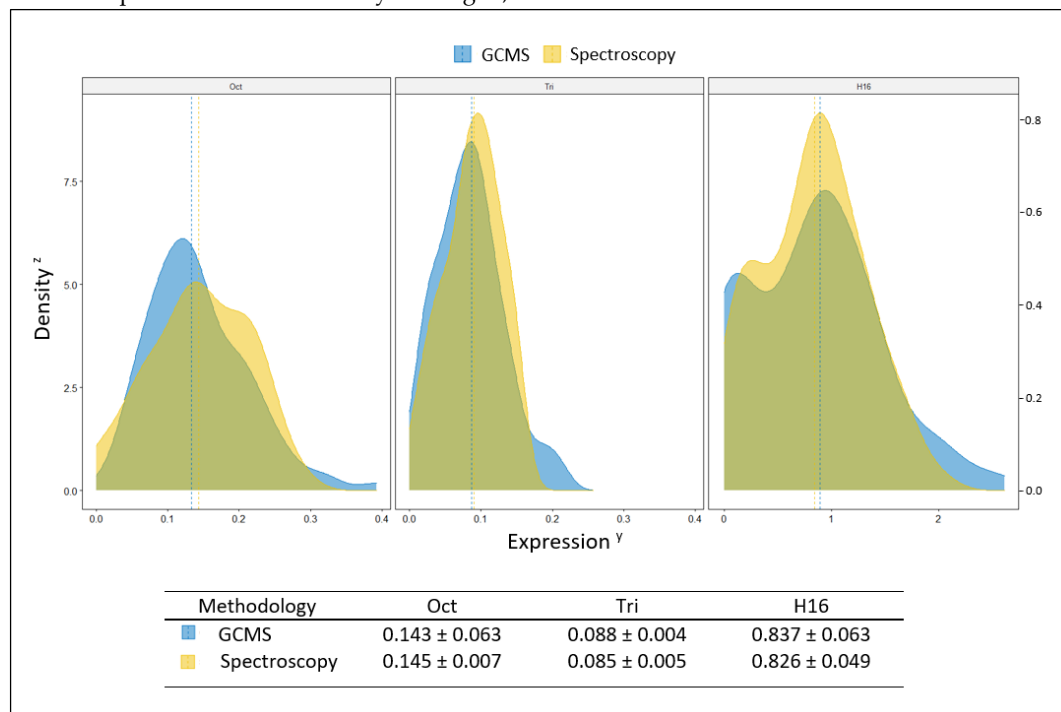

**Supplementary Figure S1.** Density plots comparing mean amounts  $\pm$  standard errors of fatty alcohols [Octacosanol-1(Oct, left) and Triacantanol-1 (Tri, center)] and ketone Hentriacontanone-16 (H16, right) from GCMS and spectroscopy. Y-axes on the left are for plots of Oct and Tri, and the y-axis on the right for H16. Horizontal axis shows amounts of wax component. Vertical dashed lines show the median for GCMS (blue) and Spectroscopy (yellow).

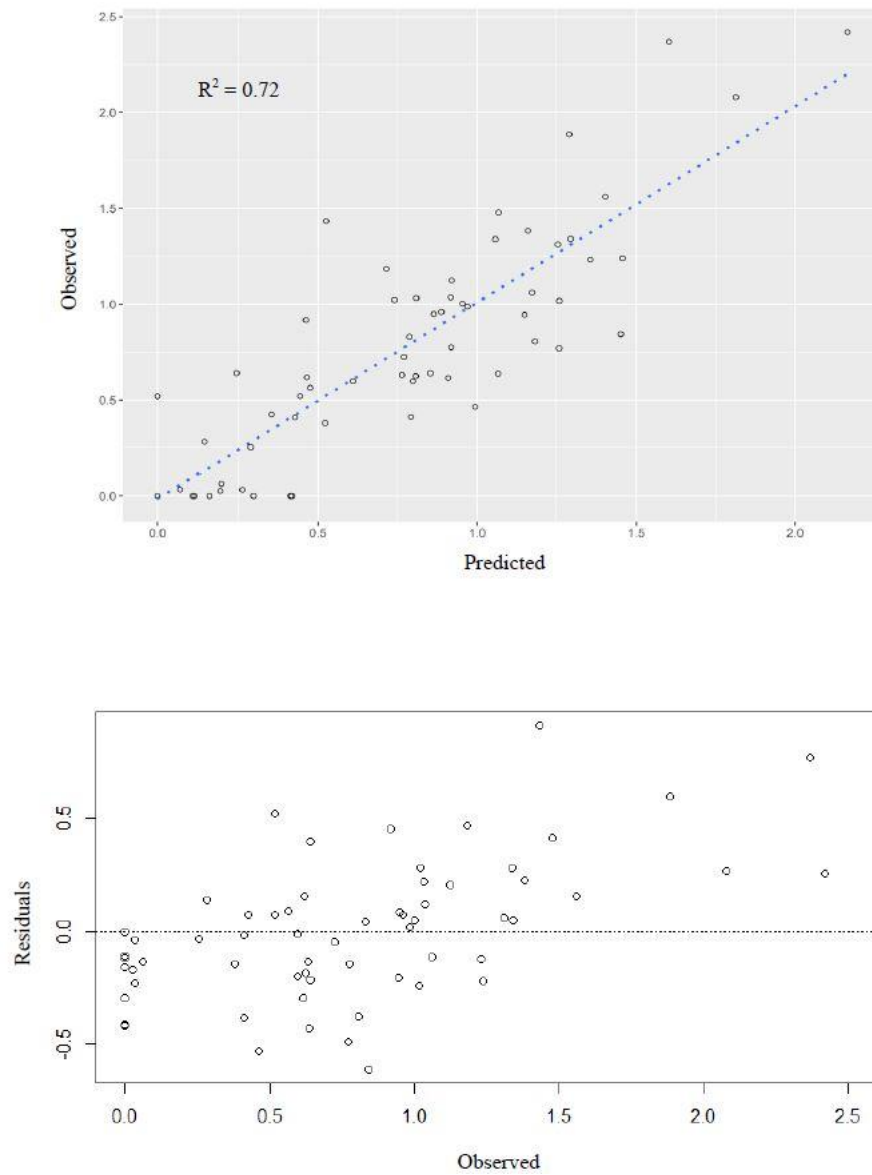

**Supplementary Figure S2.** Scatter plot of the best regression for observed and predicted H16 values (top) and plot of residuals and observed values (bottom). .
